# Supplementary material for: Structural and dynamical insights into the PH domain of p62 in human TFIIH
Source: PubMed Central journal article supplement — Nucleic Acids Res. 2020 Nov 19;49(5):2916–30. doi: 10.1093/nar/gkaa1045 (PMC7969019; doi:10.1093/nar/gkaa1045), 2020-11-19
Supplement: gkaa1045_supplemental_file.pdf [file gkaa1045_supplemental_file.pdf]

# Supplementary Figures

## Structural and dynamical insights into the PH domain of p62 in human TFIIH

**Masahiko Okuda<sup>1</sup>, Toru Ekimoto<sup>1</sup>, Jun-ichi Kurita<sup>1</sup>, Mitsunori Ikeguchi<sup>1,2</sup> and Yoshifumi Nishimura<sup>1,3</sup>**

<sup>1</sup> Graduate School of Medical Life Science, Yokohama City University, 1-7-29 Suehiro-cho, Tsurumi-ku, Yokohama 230-0045, Japan

<sup>2</sup> RIKEN Medical Sciences Innovation Hub Program, 1-7-22 Suehiro-cho, Tsurumi-ku, Yokohama 230-0045, Japan

<sup>3</sup> Graduate School of Integrated Sciences for Life, Hiroshima University, 1-4-4 Kagamiyama, Higashi-Hiroshima 739-8258, Japan

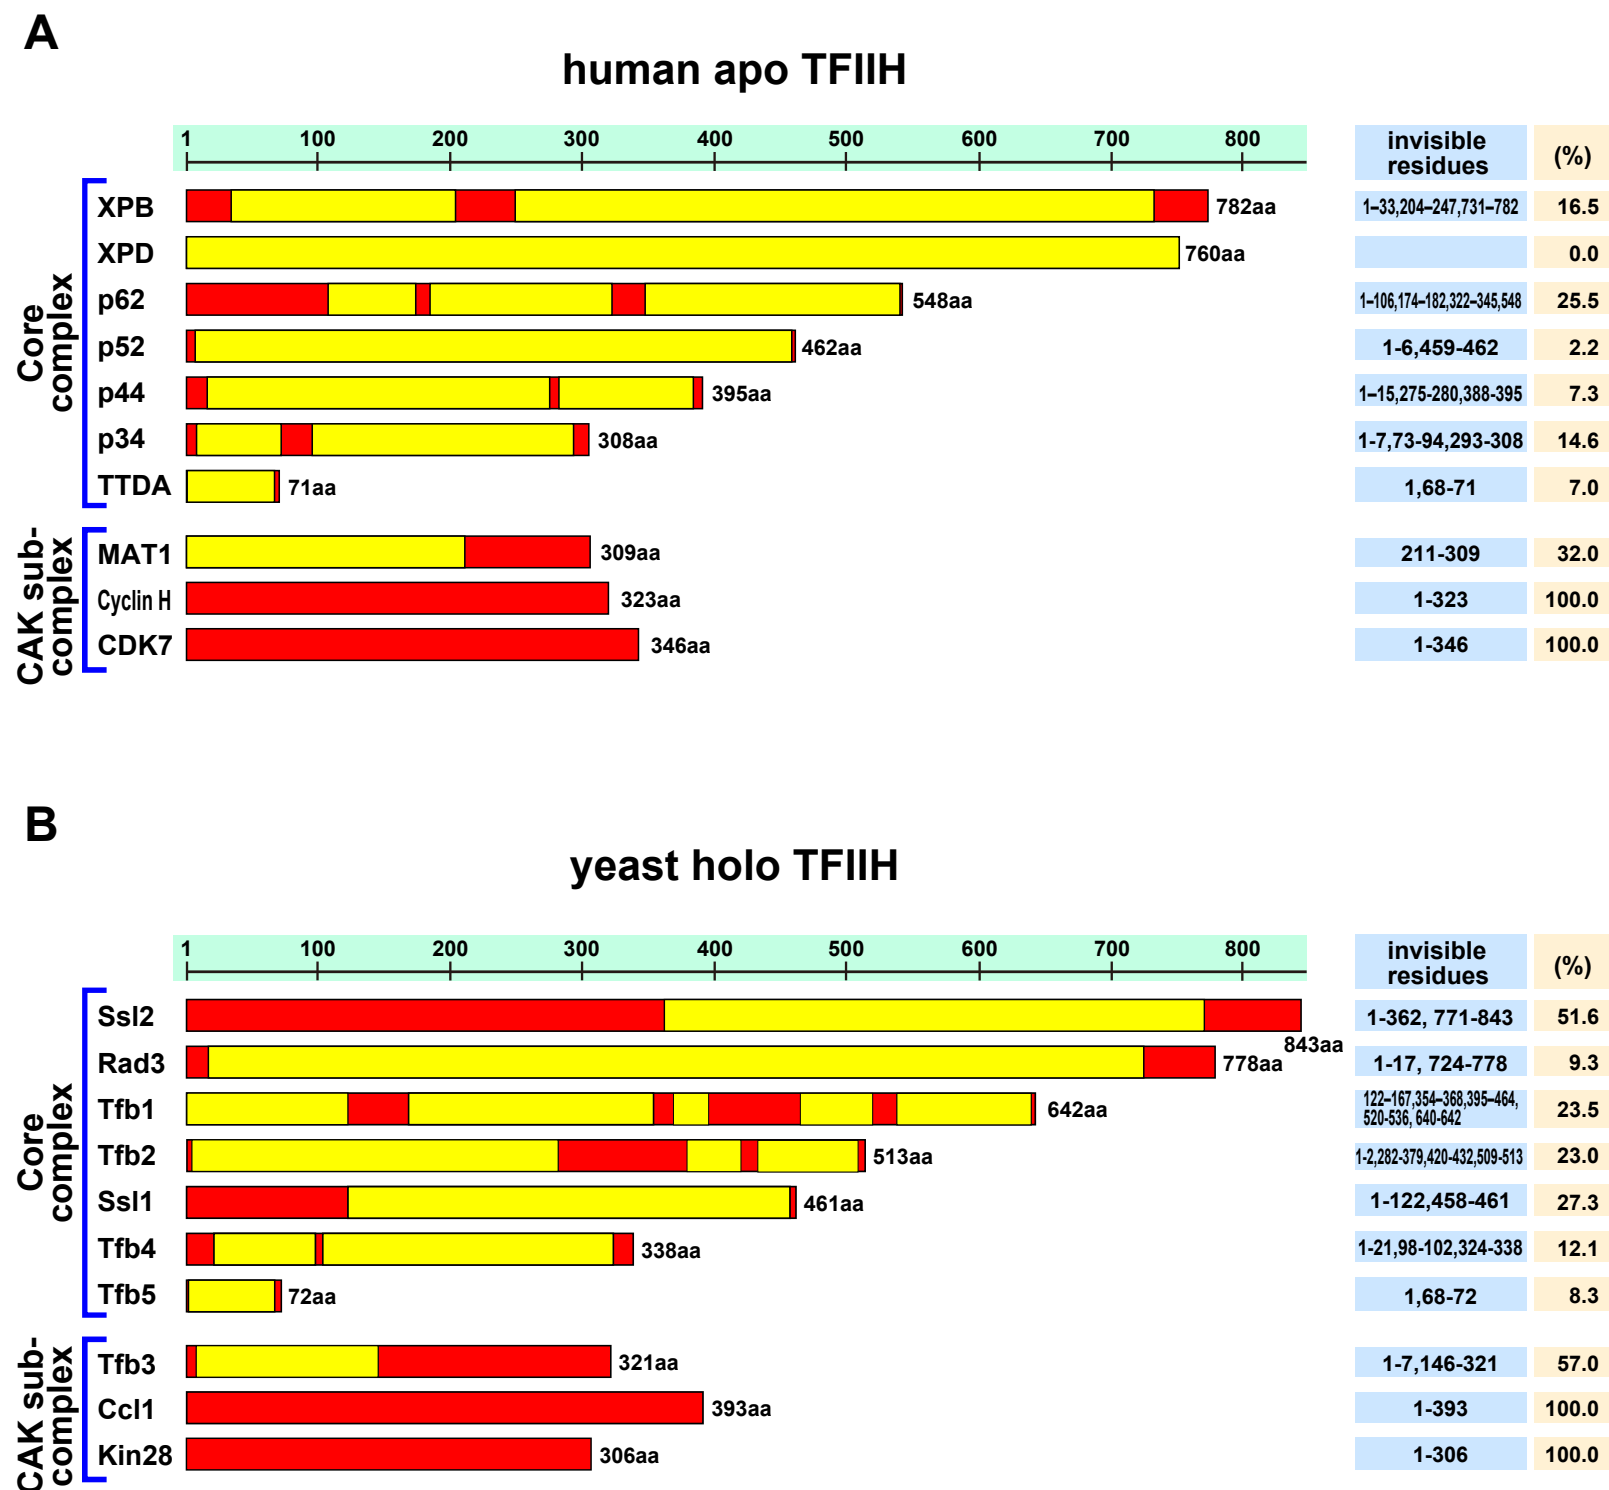

**Supplementary Figure S1. Visible and invisible regions of the Cryo-EM structures of the human apo and yeast holo TFIIH Core complexes.**

(A and B) The 10 subunits of human (A) and yeast (B) TFIIH. Regions that are visible in the Cryo-EM structures of the human apo TFIIH Core complex (PDB ID: 6NMI) and yeast holo TFIIH Core complex (PDB ID: 5OQJ) are shown in yellow; those that are invisible are shown in red. Invisible residues and their percentage in each subunit are indicated on the right.

## Interactions with PIC, activators, NER machinery

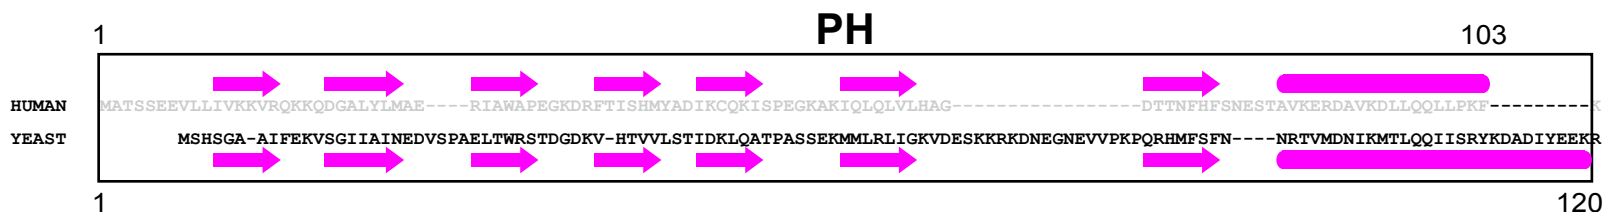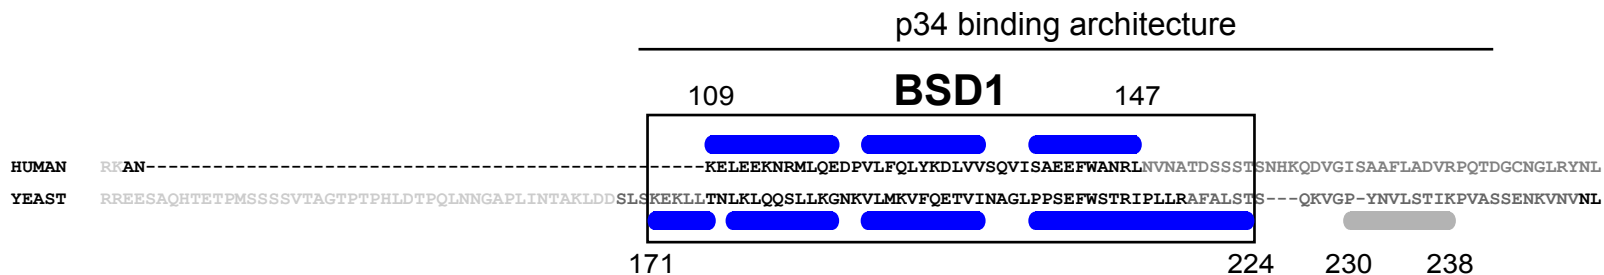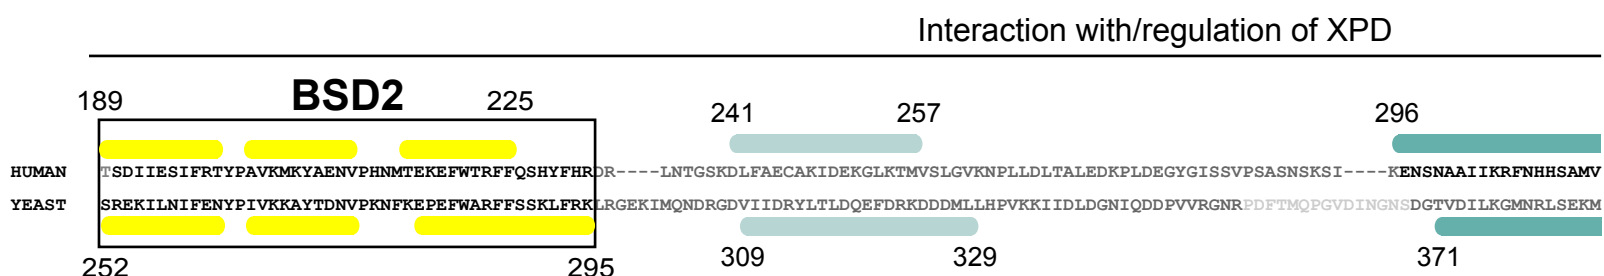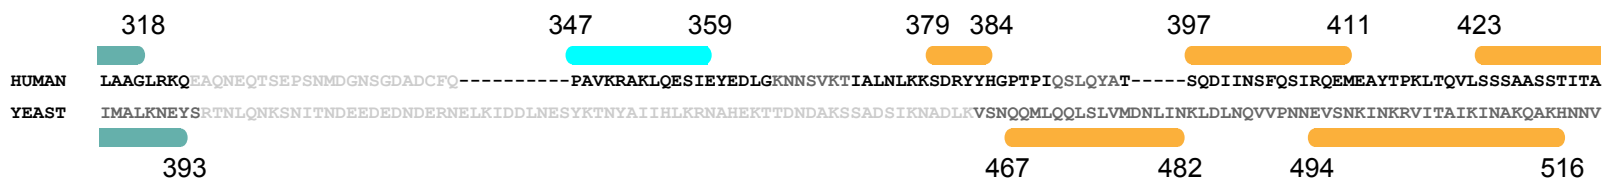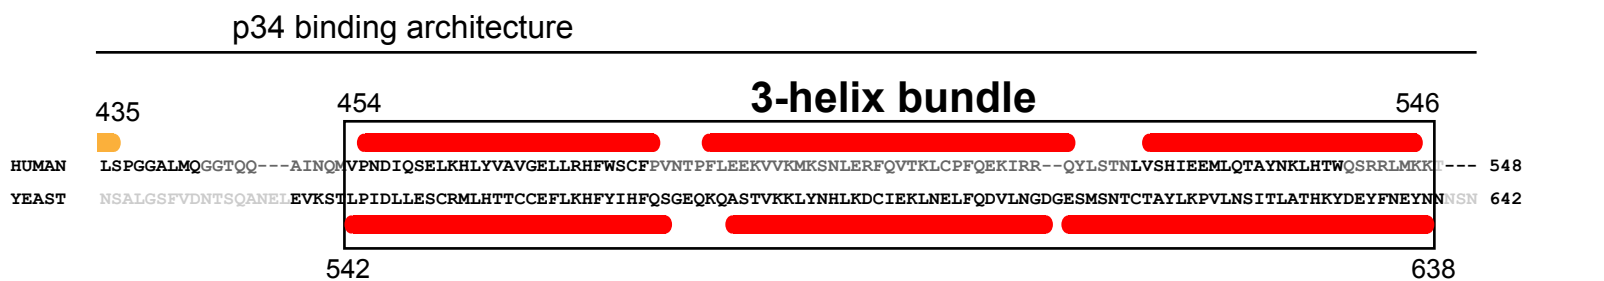

**Supplementary Figure S2. Sequence alignment of human p62 and yeast Tfb1.**

Light gray indicates amino acids not seen in the Cryo-EM structure. Gray indicates unidentified amino acids. Arrows and bars above and below the sequence indicate  $\beta$ -strands and  $\alpha$ -helices, respectively.

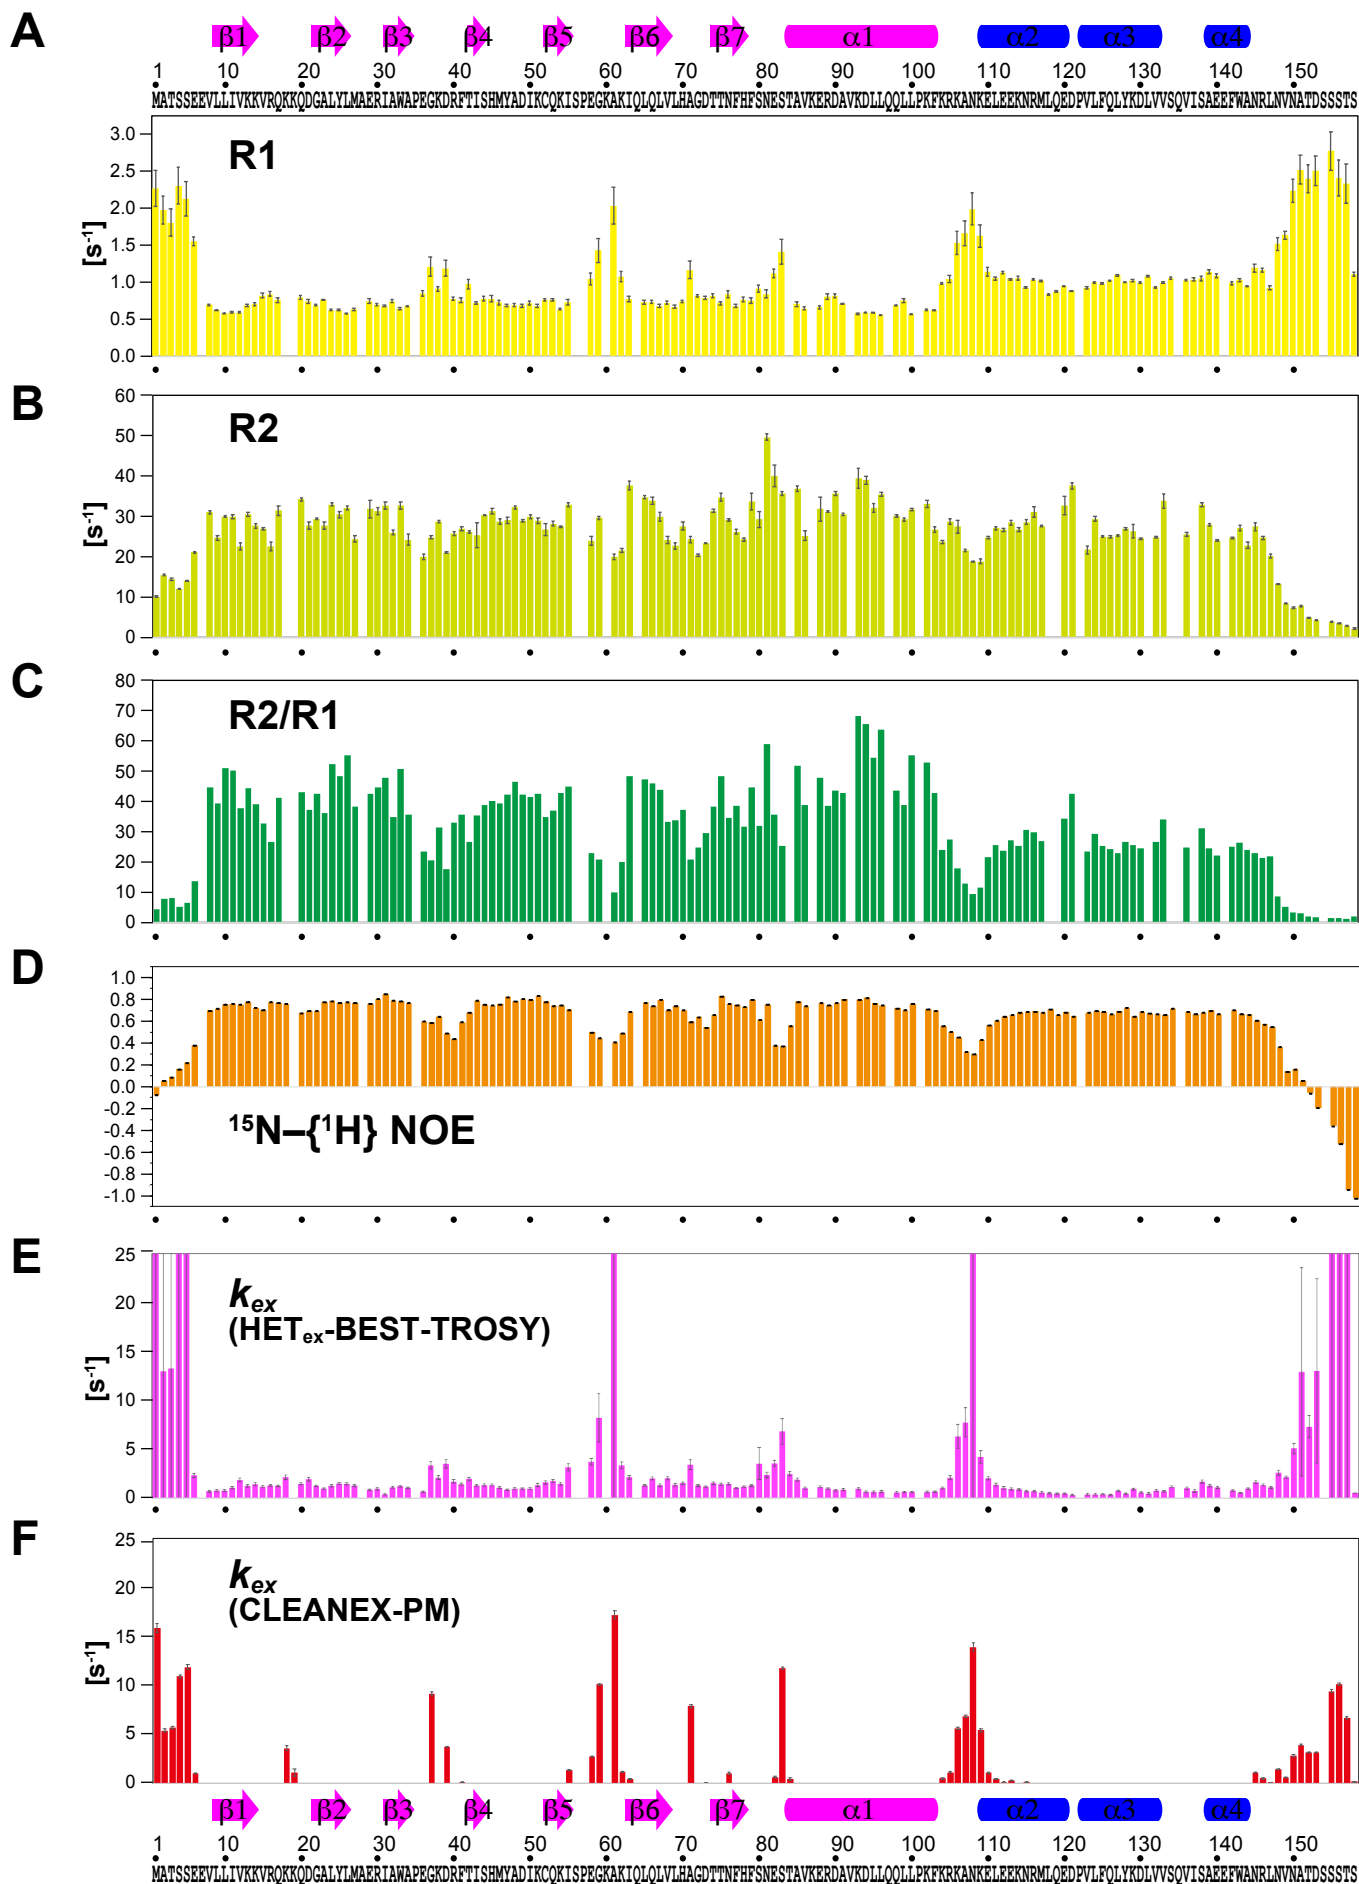

**Supplementary Figure S3. Dynamics of the PH and BSD1 domains of human TFIIH p62.**

(A)  $^{15}\text{N}$  longitudinal relaxation rate (R1). (B) Transverse relaxation rate (R2). (C) Ratio of R2 to R1. (D)  $^{15}\text{N}$ - $\{^1\text{H}\}$  nuclear Overhauser effect (NOE). (E and F) Water-amide proton exchange rate ( $k_{\text{ex}}$ ) measured by HETex-BEST-TROSY (E) and CLEANEX-PM (F).

**A**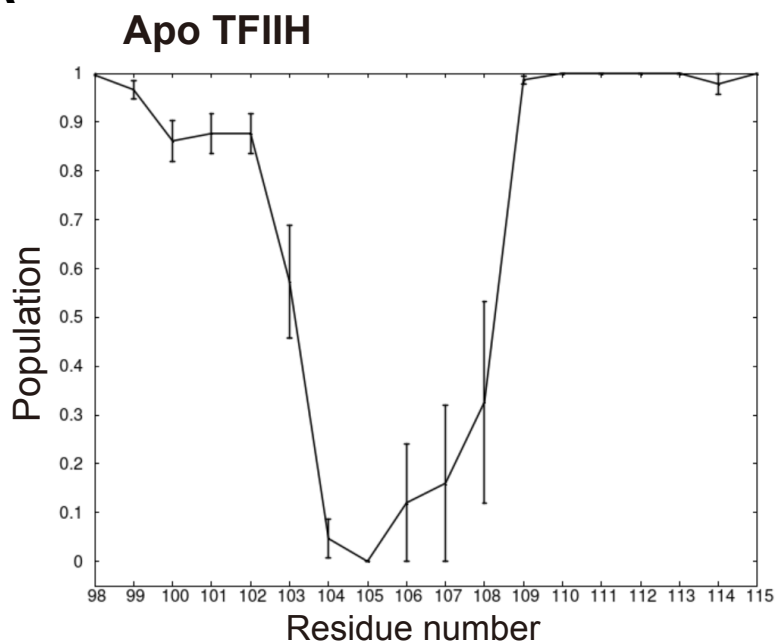**B**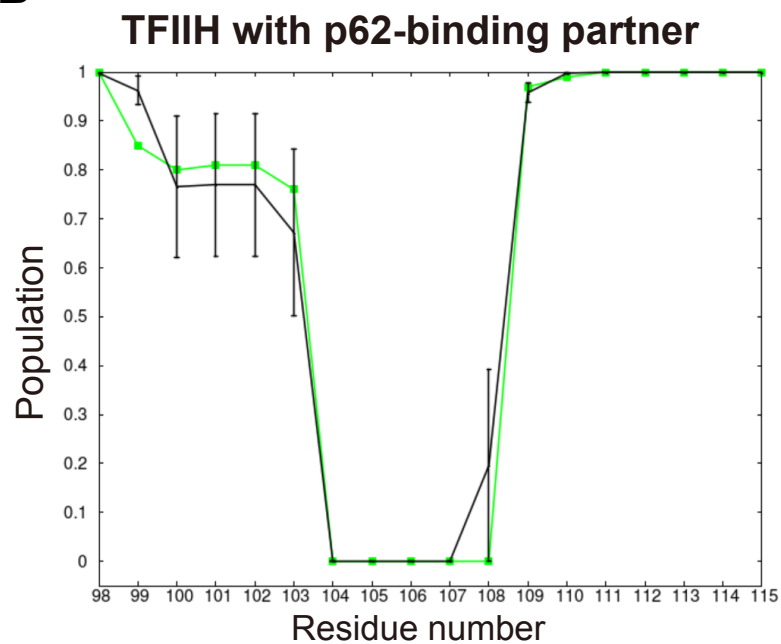

**Supplementary Figure S4. Population of helix or  $3_{10}$  helix structures for (A) apo TFIIH and (B) TFIIH with a p62-binding partner.**

The population of the helix or  $3_{10}$  helix structures is the average of (A) six or (B) five MD simulations. The green line in (B) indicates the population for the TFIIH in complex with TFII $\alpha$ . The bar represents the standard error.

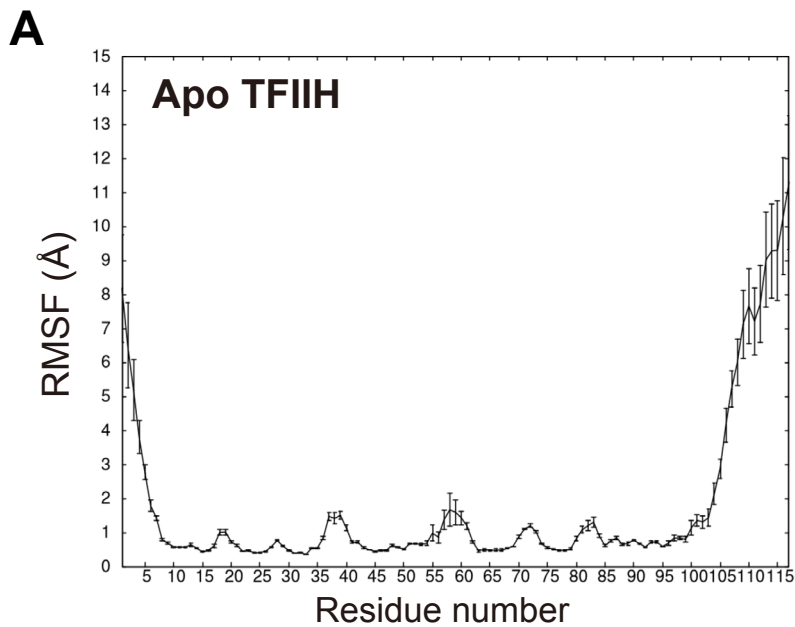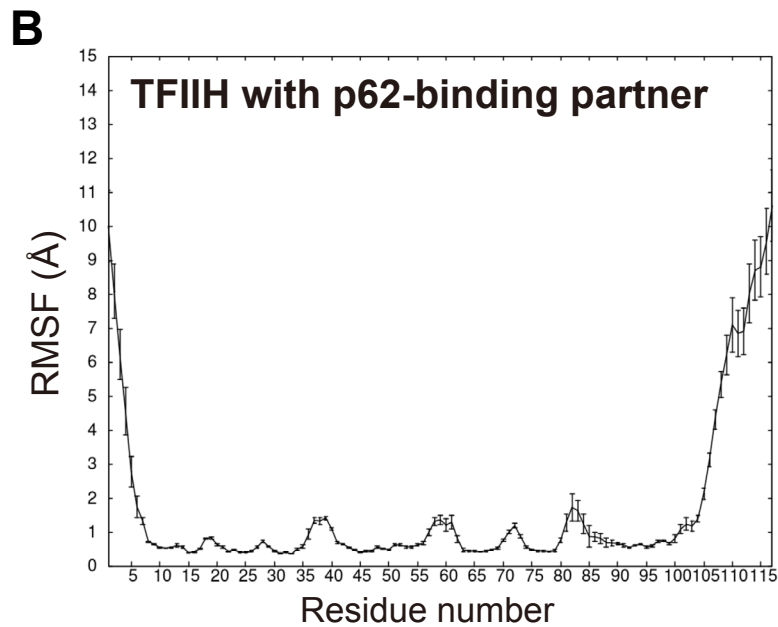

**Supplementary Figure S5. Root mean square fluctuation of the PH-D and the linker for (A) apo TFIIH and (B) TFIIH with a p62-binding partner.**

The RMSF value of each residue is the average of (A) six or (B) five MD simulations. The bar represents the standard error.

**A**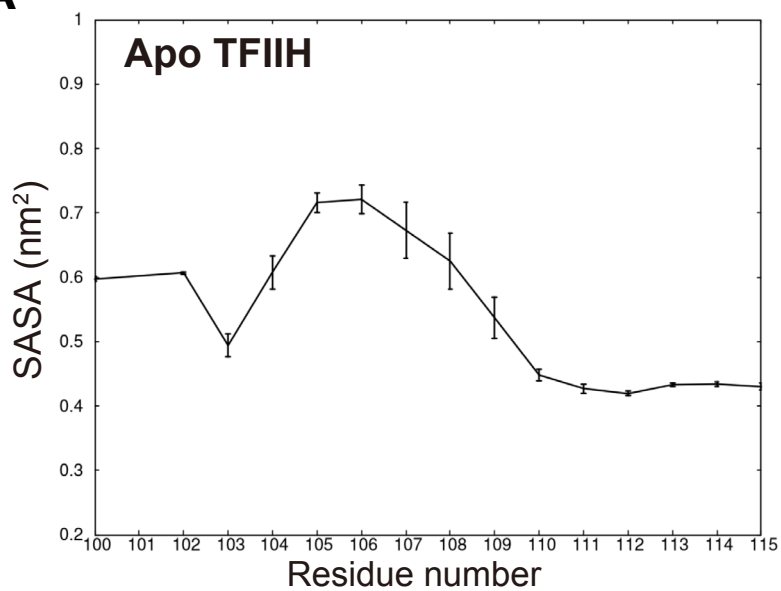**B**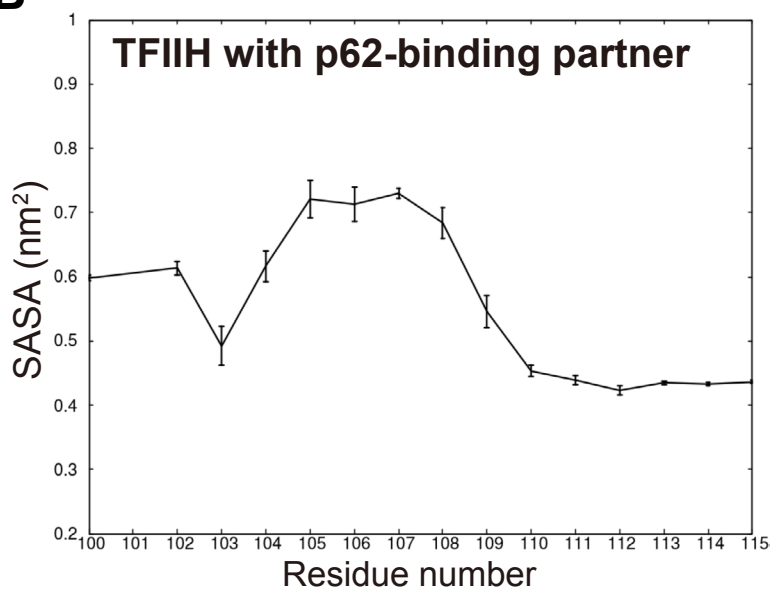

**Supplementary Figure S6. Solvent-accessible surface area of the amide hydrogens for (A) apo TFIIH and (B) TFIIH with a p62-binding partner.**

The SASA value of each residue is the average of (A) six or (B) five MD simulations. The bar represents the standard error.

**A**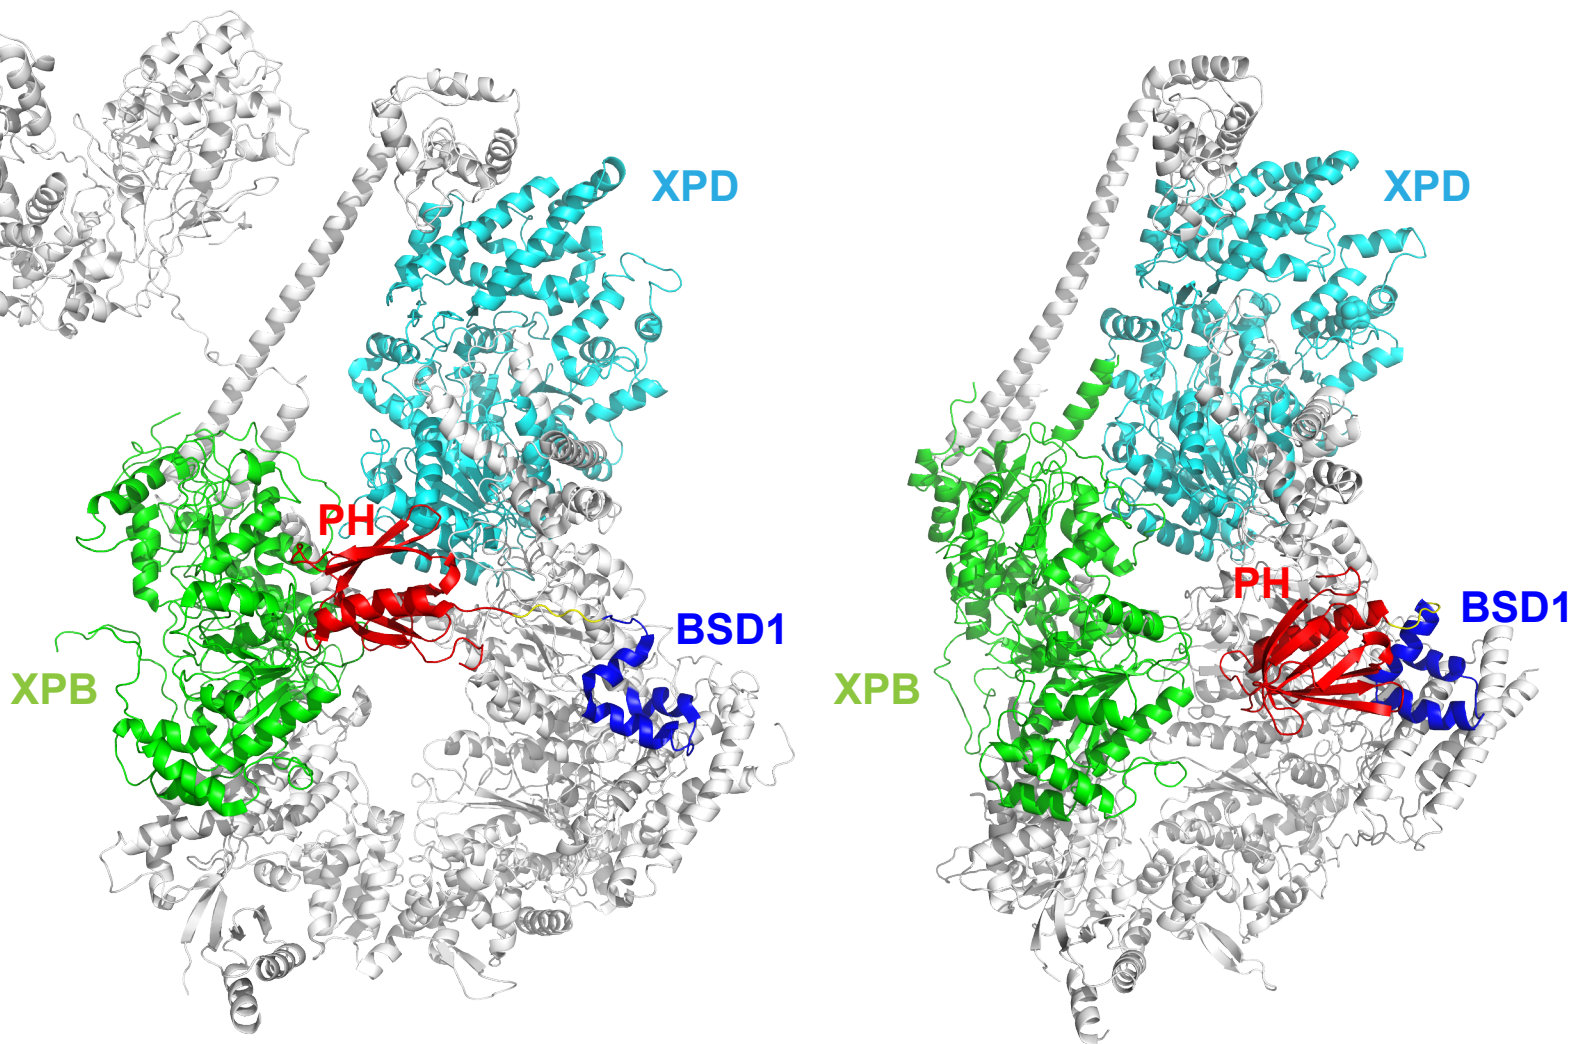**B**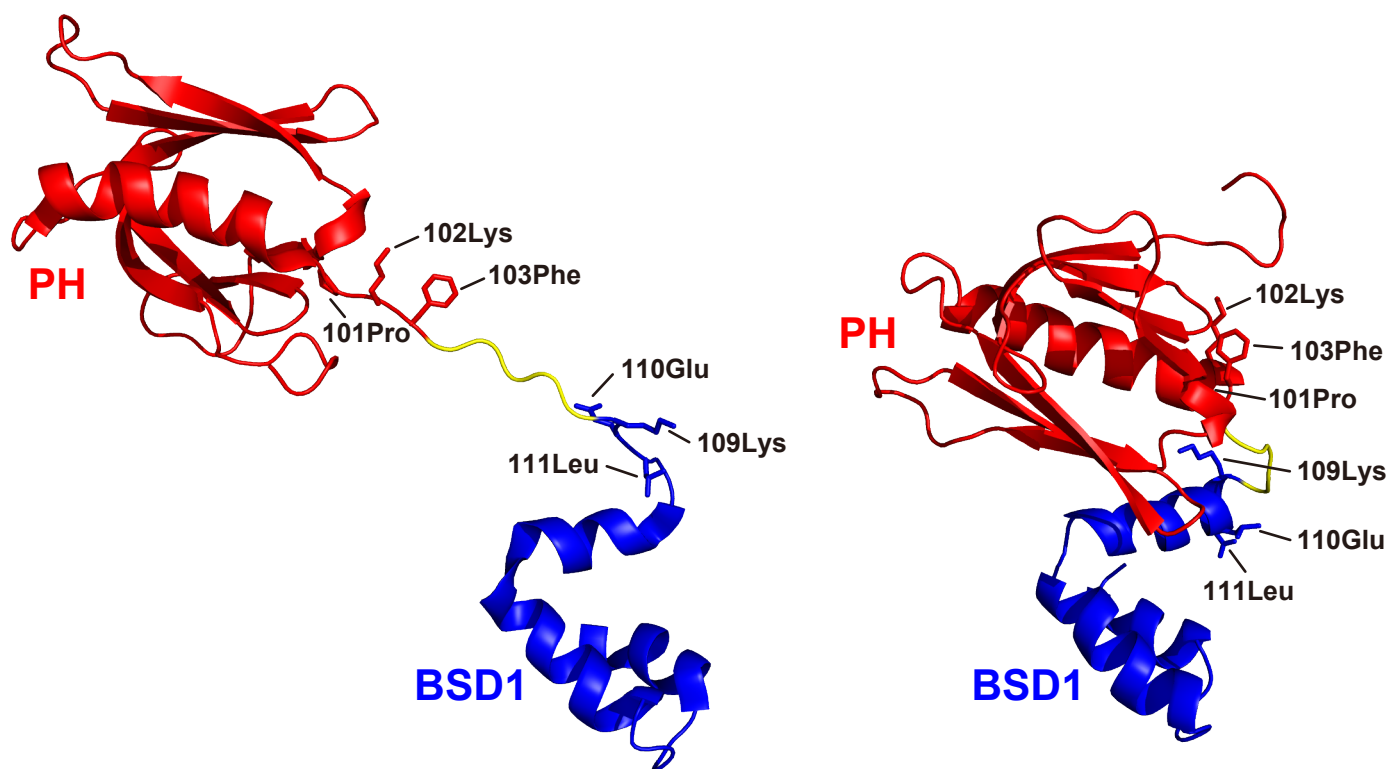

**Supplementary Figure S7. Structural comparison of the p62 PH-D between the apo and holo TFIIF complexes.** (A) Structure of the TFIIF complex. Left, holo TFIIF complex in the PIC (PDB code 6O9L); right, apo TFIIF complex (our structural model). For clarity, only the XPB and XPD subunits, PH-D, linker and BSD1 domain of p62 are colored. (B) Structure of the PH-D and BSD1 domain of p62 in the TFIIF complex. Left, holo TFIIF complex (PDB code 6O9L); right, apo TFIIF complex (our structural model).



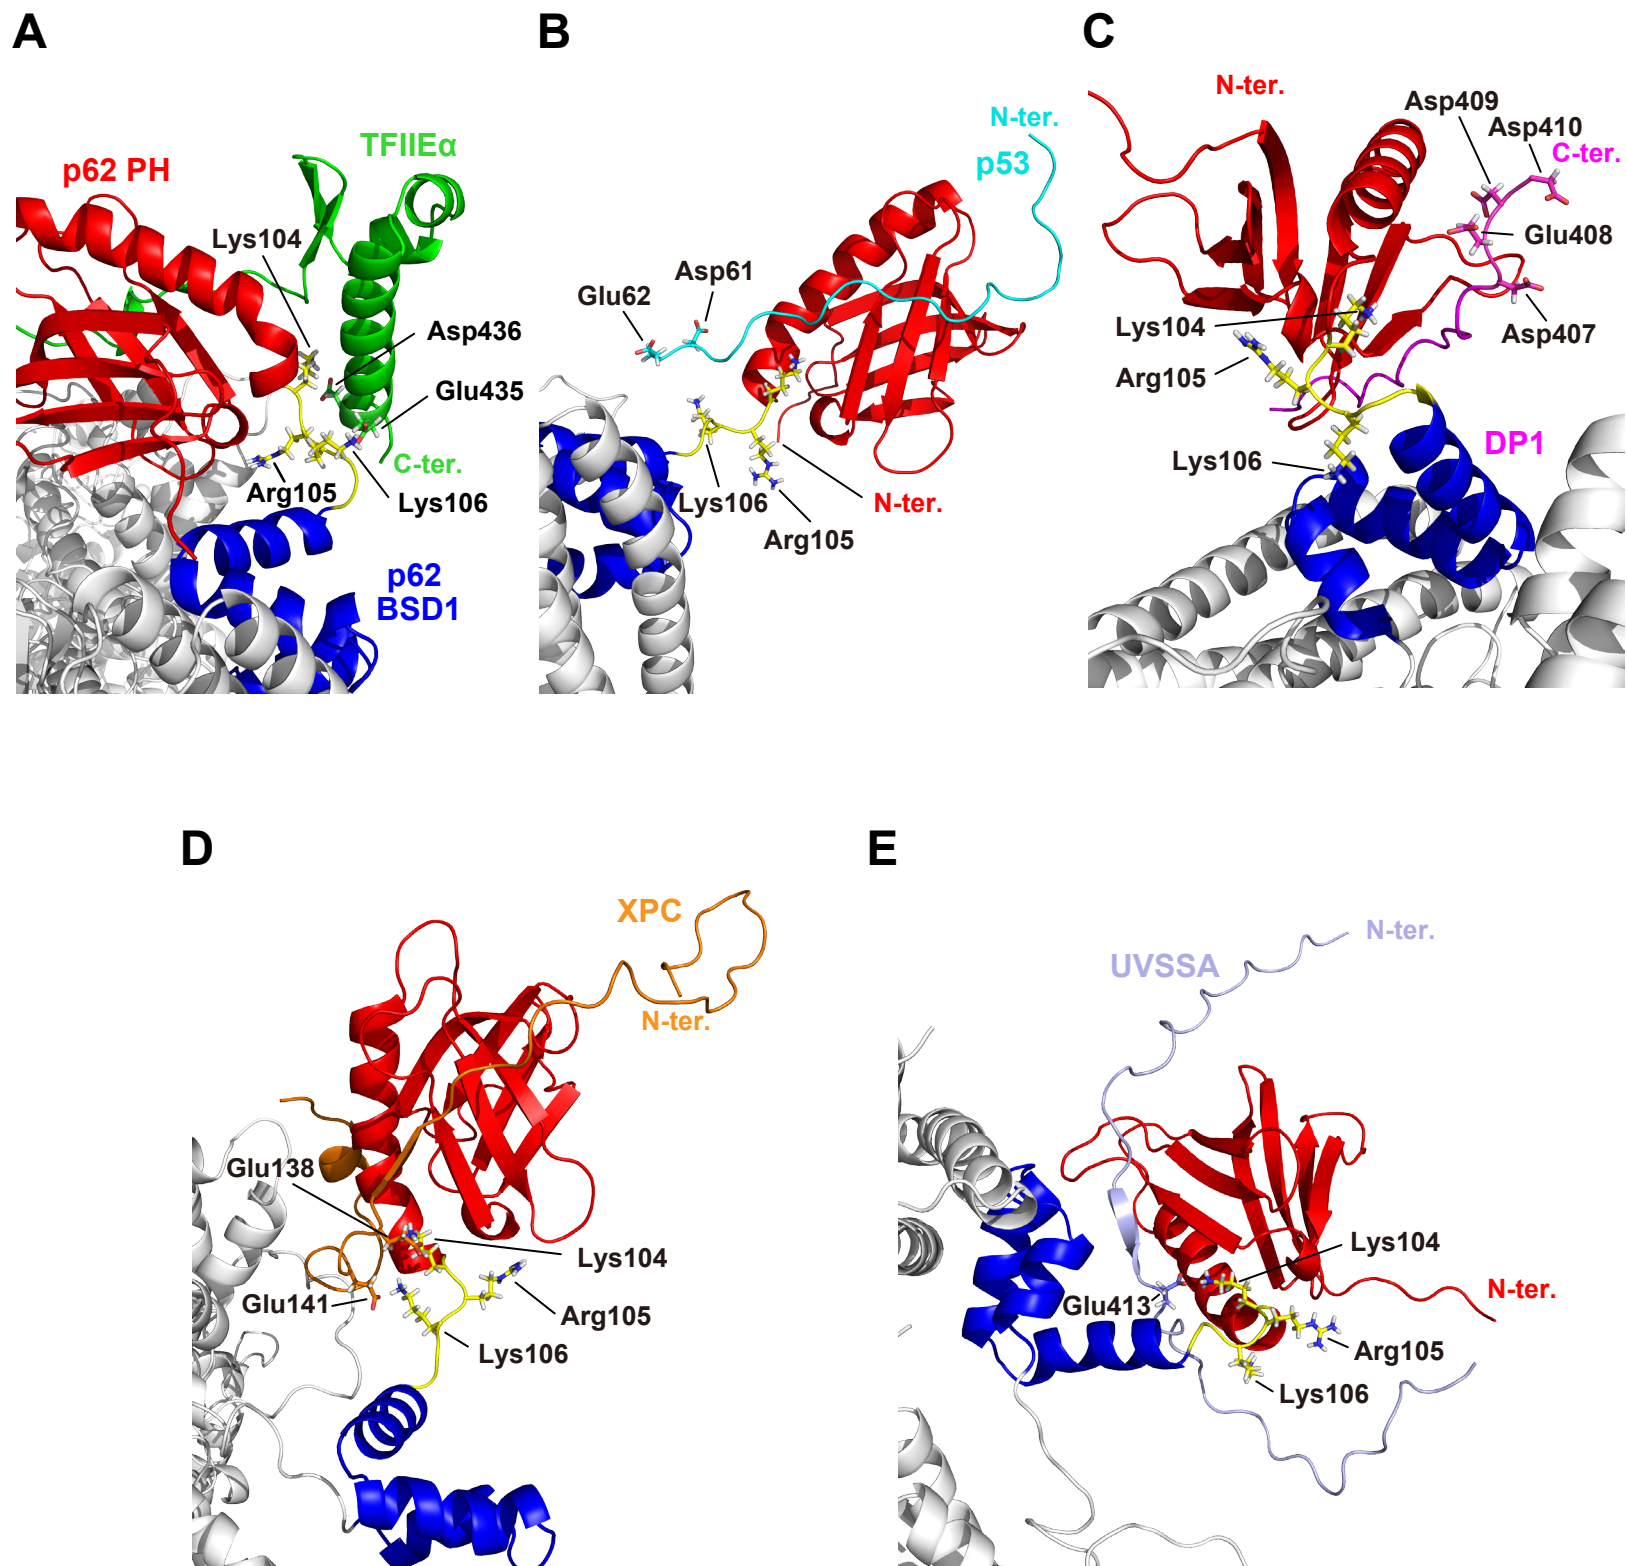

**Supplementary Figure S8. MD simulation models suggest electrostatic interactions between lysine residues in the linker of p62 and acidic residues around the C-terminus of the binding sites of p62-binding partners.**

Complex of TFIIH (gray) with TFIIIE $\alpha$  (green) (A), p53 (cyan) (B), DP1 (magenta) (C), XPC (orange) (D) and UVSSA (light blue) (E). The PH-D, BSD1 domain and linker of p62 are shown in red, blue and yellow, respectively.

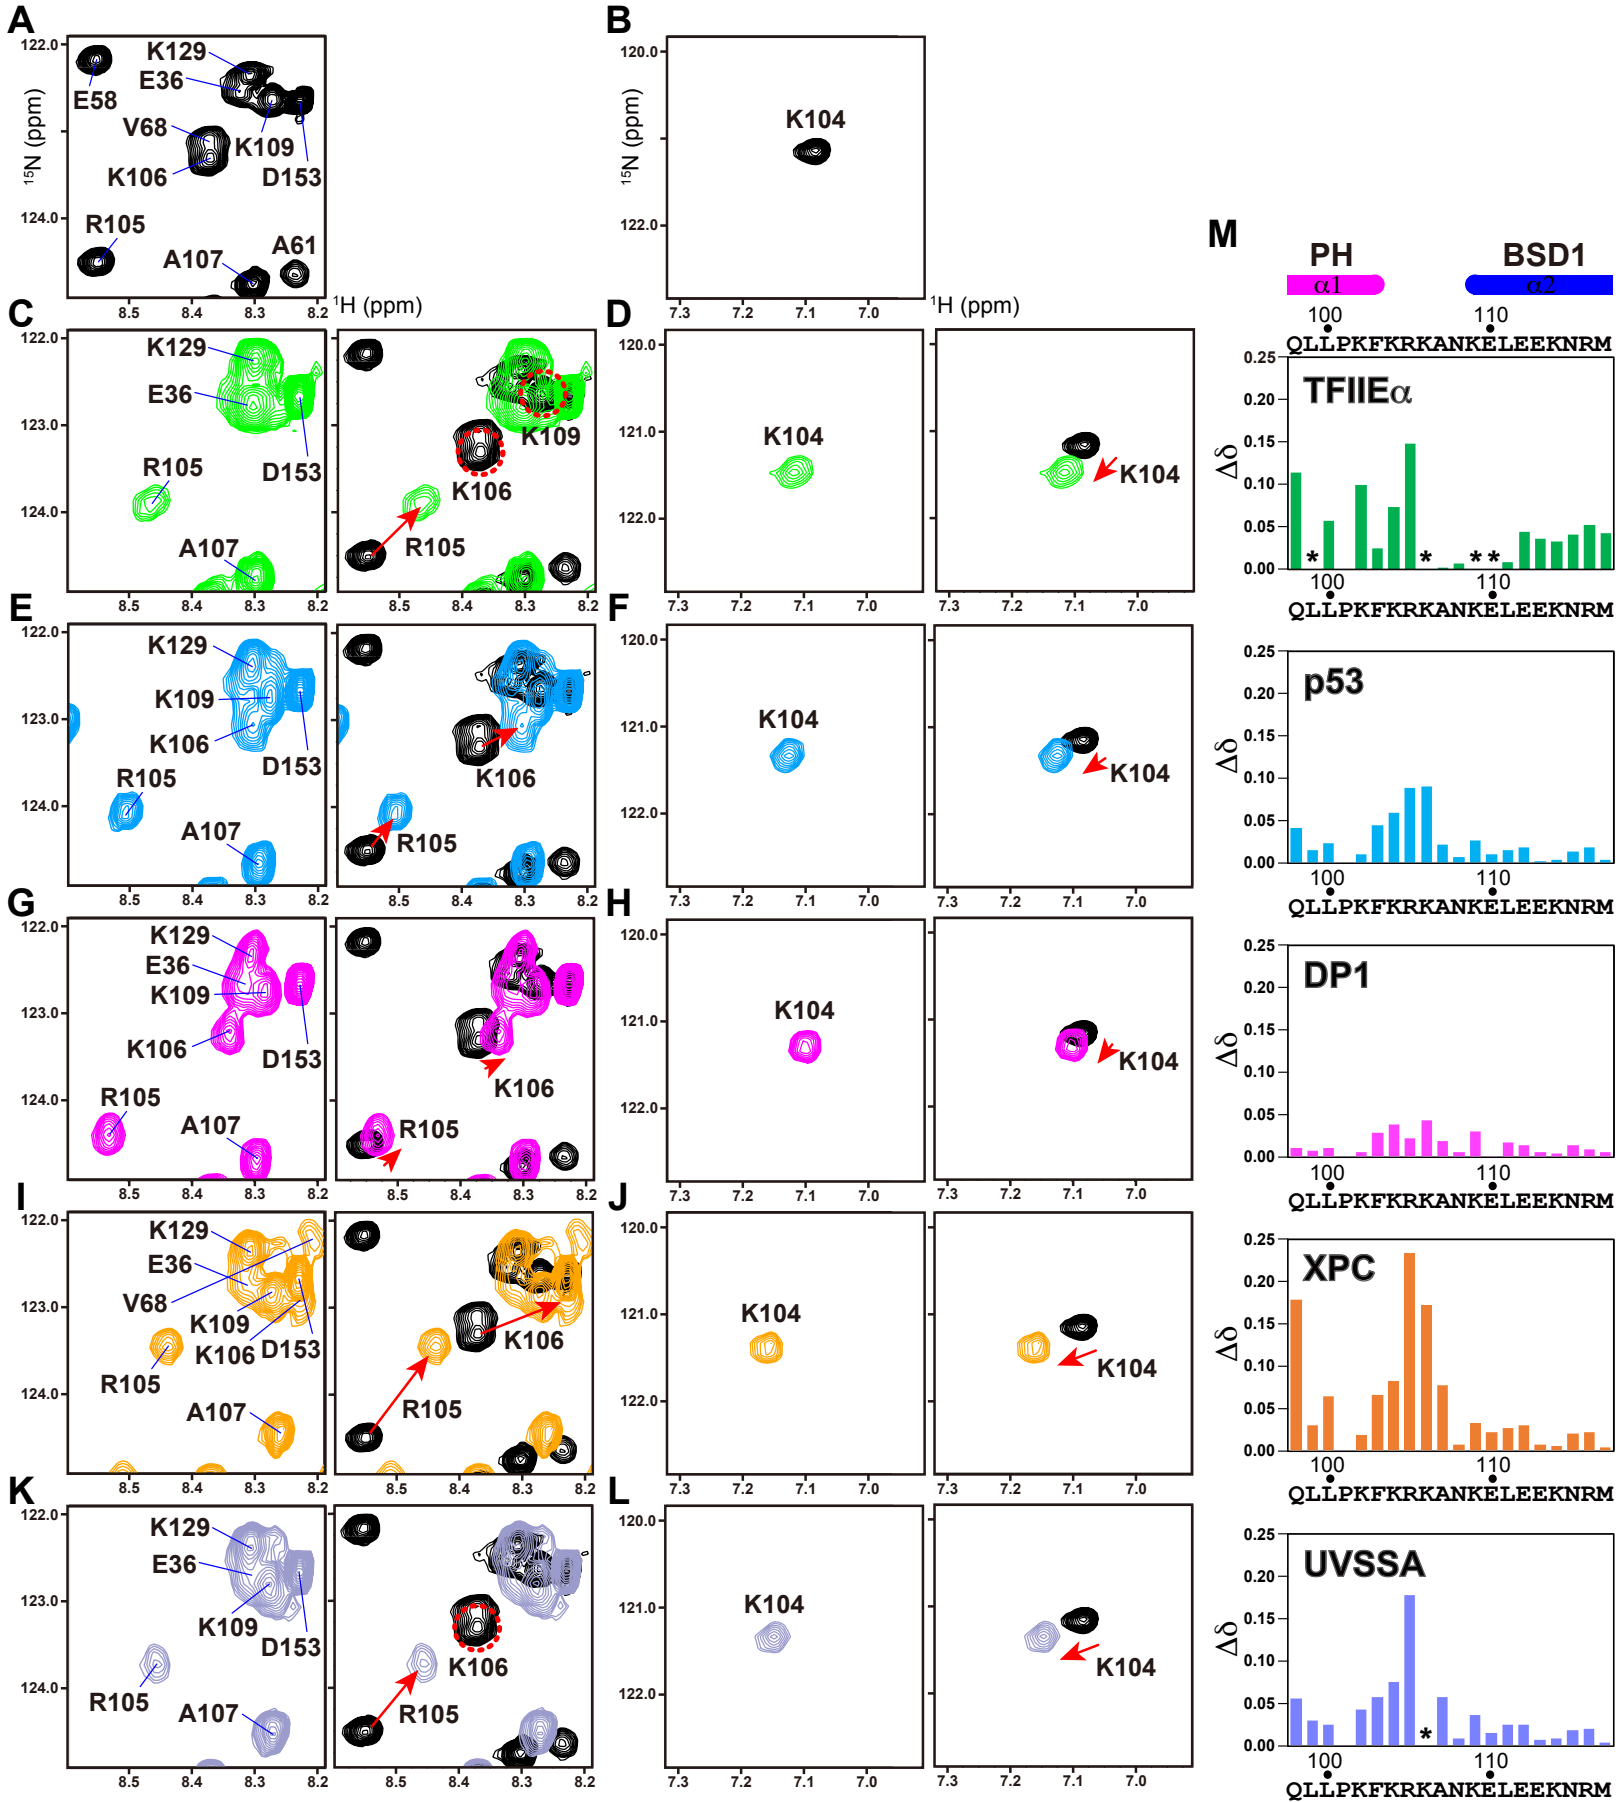

**Supplementary Figure S9. NMR chemical shift perturbation for the  $^{15}\text{N}$ -labeled PH and BSD1 domains of human TFIIH p62 with five p62-binding partners.**  $^1\text{H}$ ,  $^{15}\text{N}$ -HSQC spectra of p62 PH and BSD1 domains (black) alone (**A** and **B**) and mixed with TFIIIE $\alpha$  (green) (**C** and **D**), p53 (cyan) (**E** and **F**), DP1 (magenta) (**G** and **H**), XPC (orange) (**I** and **J**) and UVSSA (light blue) (**K** and **L**). An overlay of  $^1\text{H}$ ,  $^{15}\text{N}$ -HSQC spectra before (black) and after the addition of unlabeled p62-binding partner is shown in the righthand panels. Arrows indicate basic residues showing a significant chemical shift change, and dotted circles indicate unassigned signals due to disappearance or overlap with other signals after addition of the unlabeled sample. (**M**) Histogram showing the chemical shift change ( $\Delta\delta$ ) per residue of the inter-domain linker of p62.  $\Delta\delta$  was calculated as  $\Delta\delta = \{(\Delta\delta^1\text{H})^2 + (\Delta\delta^{15}\text{N}/5)^2\}^{1/2}$ . Asterisks indicate residues whose signals were unassigned due to disappearance or overlap with other signals. **10**
